# Supplementary material
Source: PubMed Central journal article supplement (PMC5792071)
Supplement: NIHMS935830-supplement-Table_S2.pdf [file NIHMS935830-supplement-Table_S2.pdf]

TABLE S2. Regions removed from the aligned analyses for the chloroplast (cpDNA) and PHYA regions with justification for the removal

| Position - cpDNA | Justification                               |
|------------------|---------------------------------------------|
| 428              | poly A region                               |
| 646-650          | poly T region                               |
| 846-850          | poly A region                               |
| 868-1300         | AT repeat rich region of uncertain homology |
| 1455-1460        | AT repeat rich region of uncertain homology |
| 1490-1495        | poly G region                               |
| 1547-1570        | poly T region/ region of uncertain homology |
| 1679-1680        | poly T region                               |
| 1920-1928        | poly A region                               |
| 1934-1939        | poly A region                               |
| 2024-2028        | poly T region                               |
| 2032-2033        | region of uncertain homology                |
| 2057-2069        | region of uncertain homology                |
| 2161-2179        | poly A region/ region of uncertain homology |
| 2236-2241        | poly A/ repeat region                       |
| 2336-2393        | poly T region/ region of uncertain homology |
| 2454-2497        | AT repeat /poly T region                    |
| 2644-2646        | poly T region                               |
| 2727-2729        | region of uncertain homology                |
| 3730-3732        | poly T region                               |
| 3739-3744        | poly A region                               |
| 4938-4971        | region of uncertain homology                |
| 5026-5049        | poly A region/ region of uncertain homology |
| 5192-5246        | poly A /repeat region                       |
| 5263-5299        | poly A /repeat region                       |
| 5368-5432        | poly T region of uncertain homology         |
| 5444-5445        | poly T region of uncertain homology         |
| 5526-5541        | repeat region                               |
| 5775-5785        | region of uncertain homology                |
| 5982-5983        | poly T region of uncertain homology         |
| 6032-6037        | region of uncertain homology                |
| 6252-6260        | poly A /repeat region                       |
| 6319-6733        | region of uncertain homology                |
| 6879-6885        | AT repeat region                            |
| 6833-6845        | poly T region                               |
| 6931-6933        | poly A region                               |
| 7159-7203        | poly T region                               |
| 7227-7249        | region of uncertain homology                |
| 7434-7538        | poly T region/ region of uncertain homology |
| 7717-7737        | AT repeat region                            |
| 7855-7860        | poly G region                               |
| 7972-8022        | region of uncertain homology                |

|                 |                                                |
|-----------------|------------------------------------------------|
| 8168-8170       | region of uncertain homology                   |
|                 |                                                |
| Position - PHYA | Justification                                  |
| 8601-8648       | region of uncertain homology                   |
| 8708-8713       | region of uncertain homology                   |
| 8778-8819       | repeat region                                  |
| 8884-8970       | repeat region and region of uncertain homology |
| 9031-9081       | repeat region                                  |
| 9151-9166       | region of uncertain homology                   |
| 9193-9202       | region of uncertain homology                   |
