# Supplementary material
Source: PubMed Central journal article supplement (PMC5792071)
Supplement: NIHMS935830-supplement-Table_S3.pdf [file NIHMS935830-supplement-Table_S3.pdf]

TABLE S3: List of primers used for DNA amplification and sequencing. Overview of all primers for A: the nuclear *phyA* region, and B: the chloroplast encoded *trnK*-intron, *matK* gene and *trnK-psbA* region, including orientation, sequence and the group they have been used. Primer orientation is given as: F: forward primer, R: reverse primer. Published primers are cited by the original reference, all other primers derive from this study.

| Region | Name                           | Reference | Direction | Sequence                    | Taxa                                                        |
|--------|--------------------------------|-----------|-----------|-----------------------------|-------------------------------------------------------------|
| A      | SarcF                          |           | F         | ACATTATCCGGCCA<br>CGGA      | <i>Schisandraceae, Magnoliaceae, Pseudowintera</i>          |
| A      | MagF                           |           | F         | CATTATCCTGCCACD<br>GA       | <i>Austrobaileya</i>                                        |
| A      | PiperF                         |           | F         | CACTACCCTGCTACC<br>GA       | <i>Piper, Peperomia, Verhuellia</i>                         |
| A      | NymF                           |           | F         | GCACTATCCTGCTAC<br>CGA      | <i>Galbulimima, Hedycaria, Euryale, Victoria, Hernandia</i> |
| A      | BrasF                          |           | F         | GCATTATCCTGCCAC<br>TGA      | <i>Brasenia, Gyrocarpus</i>                                 |
| A      | AristoF                        |           | F         | DCATTACCCRGCCA<br>CAGA      | <i>Aristolochia</i>                                         |
| A      | Aris F                         |           | F         | CACTATCCGGCCAC<br>DGA       | <i>Anemopsis, Asarum</i>                                    |
| A      | ChlF                           |           | F         | ACATTATCCGGCCA<br>CAGA      | <i>Neolitsea, Lindera, Chloranthus</i>                      |
| A      | IdioF                          |           | F         | GCATTATCCTGCTAC<br>TGA      | <i>Doryphora</i>                                            |
| A      | BAPHYAR                        |           | R         | ACAGCWGCCATYCC<br>ACA       | <i>Asarum, Neolitsea, Lindera, Galbulimima, Hedycaria,</i>  |
| A      | EupR                           |           | R         | CACAGCTGCCATCC<br>CACA      | <i>Magnolia, Liriodendron, Pseudowintera, Verhuellia</i>    |
| A      | SarcR                          |           | R         | CACAGCTGCCATTCC<br>ACA      | <i>Schisandra, Kadsura, Gyrocarpus</i>                      |
| A      | PiperR                         |           | R         | ACGGCGGCCATCCC<br>ACA       | <i>Piper, Peperomia</i>                                     |
| A      | AristoR                        |           | R         | CTMACDGCWGCCAT<br>ACCACA    | <i>Aristolochia</i>                                         |
| B      | trnK-F (Wicke and Quandt 2009) |           | F         | GGGTTGCTAACTCA<br>ATGGTAGAG | gymnosperms, angiosperms                                    |
| B      | trnK-F-angio1                  |           | F         | GGGTTGCTAACTCA<br>ACGGTAGAG | angiosperms                                                 |
| B      | MG-15 (Liang and Hilu 1996)    |           | F         | ATCTGGGTTGCTAAC<br>TCAATG   | <i>Neocinnamomum, Peperomia</i>                             |
| B      | GKO-matK-750-F                 |           | F         | ATCGCACCGTGTATT<br>ATTTC    | <i>Ginkgo</i>                                               |
| B      | Hy-1330-F                      |           | F         | GGGATGCTCCTTCTT<br>TGC      | <i>Hydatella</i>                                            |
| B      | Po-trnK-650-R                  |           | F         | CATAGAGAAAGCCG<br>TGTGC     | <i>Porcelia</i>                                             |

|   |                                          |   |                               |                                                                                                                                                                                                                                                                 |
|---|------------------------------------------|---|-------------------------------|-----------------------------------------------------------------------------------------------------------------------------------------------------------------------------------------------------------------------------------------------------------------|
| B | AR-matK-420-F<br>(Wanke et al.<br>2006)  | F | AAGTGAATAAATGG<br>ATAGAGC     | <i>Aristolochia</i>                                                                                                                                                                                                                                             |
| B | TH-matK-420-F<br>(Wanke et al.<br>2006)  | F | AACTGAATAAATGG<br>ATAGAGC     | <i>Thottea</i>                                                                                                                                                                                                                                                  |
| B | Lau-matK-800-F                           | F | GACYGTATCGYACT<br>ATGTAT      | <i>Lauraceae, Chloranthaceae,<br/>Hernandiaceae,</i>                                                                                                                                                                                                            |
| B | DP-matK-1950-F                           | F | GACCGTATCGYACT<br>ATG         | <i>Nymphaeaceae, Magnoliales,<br/>Laurales, Chloranthaceae,<br/>Winteraceae, Canellaceae</i>                                                                                                                                                                    |
| B | Ny-matK-480-F<br>(Borsch et al.<br>2003) | F | CATCTGGAAATCTTG<br>STTC       | <i>Nymphaeaceae, Illiciaceae,<br/>Chloranthaceae, Magnoliaceae,<br/>Degeneriaceae, Himantandraceae,<br/>Eupomatiaceae, Annonaceae,<br/>Atherospermataceae,<br/>Gomortegaceae, Siparunaceae,<br/>Hernandiaceae, Lauraceae,<br/>Cannelaceae, Aristolochiaceae</i> |
| B | BA-matK-2320-F                           | F | CATGTATATGAATG<br>BGAATC      | <i>Sparattanthelium, Asarum</i>                                                                                                                                                                                                                                 |
| B | Pi-matK-1480-F<br>(Wanke et al.<br>2006) | F | TCGTAAACAYAAAA<br>GTAC        | <i>Chloranthaceae, Magnoliaceae,<br/>Myristicaceae, Degeneriaceae,<br/>Eupomatiaceae, Annonaceae,<br/>Monimiaceae, Lauraceae,<br/>Aristolochiaceae, Asaraceae,<br/>Piperaceae</i>                                                                               |
| B | DP-trnk-4530-F                           | F | GCAAYGAAAAATGC<br>AAGCACGG    | <i>Ginkgo, Hydatella,</i>                                                                                                                                                                                                                                       |
| B | psbA-R (Steele<br>and Vilgalys<br>1994)  | R | CGCGTCTCTCTAAAA<br>TTGCAGTCAT | <i>gymnosperms, angiosperms</i>                                                                                                                                                                                                                                 |
| B | trnK-R2 (Wicke<br>and Quandt<br>2009)    | R | TCGAACCCGGA<br>HGTCCG         | <i>Ginkgo, Austrobaileyales,<br/>Chloranthales, Magnoliales,<br/>Gomortegaceae, Hernandiaceae,<br/>Lauraceae, Winteraceae,<br/>Aristolochiaceae, Asaraceae,<br/>Piperaceae</i>                                                                                  |
| B | MLC-matK-<br>3240-R                      | R | TATGTTTACGAGMC<br>AAAGTTCTA   | <i>Magnoliales, Laurales, Cannelales</i>                                                                                                                                                                                                                        |
| B | DP-matK-3650-R                           | R | TAGCACAHGAAAGT<br>CGAAG       | <i>Ginkgo, Hydatella, Illiciaceae,<br/>Chloranthaceae, Myristicaceae,<br/>Eupomatiaceae, Annonaceae,<br/>Siparunaceae, Gomortegaceae,<br/>Hernandiaceae, Lauraceae,<br/>Aristolochiaceae, Asaraceae,<br/>Piperaceae</i>                                         |
| B | Ny-matK-2850-R                           | R | CGGTTGAGACCATA<br>AGTGAAAATG  | <i>Hydatellaceae</i>                                                                                                                                                                                                                                            |

|   |                                           |   |                            |                                                                                                                                   |
|---|-------------------------------------------|---|----------------------------|-----------------------------------------------------------------------------------------------------------------------------------|
| B | DP-matK-2740-R                            | R | CATCTGGAAATCTTG<br>STTC    | Nymphaeaceae, Illiciaceae,<br>Chloranthales, Magnoliales,<br>Laurales, Winteraceae, Canellaceae,<br>Aristolochiaceae, Asaroideae, |
| B | BA-matK-2335-R                            | R | GATTCVCATTCATAT<br>ACATG   | Hydatellaceae, Chloranthaceae,<br>Magnoliaceae, Annonaceae,<br>Winteraceae,                                                       |
| B | DP-matK-1900-R                            | R | CATAGTRCGATACR<br>GTC      | <i>Hedyosmum</i> , <i>Mollinedia</i> , <i>Cassytha</i> ,<br><i>Aristolochia</i>                                                   |
| B | AR-matK-1450-<br>R (Wanke et al.<br>2006) | R | CGTTAGAGTTGCAC<br>GTTA     | <i>Aristolochia</i>                                                                                                               |
| B | TH- 730-R<br>(Oelschlägel et<br>al. 2009) | R | TGCGATACAGTCAG<br>AACAAAGG | <i>Thottea</i>                                                                                                                    |

---
