# Supplementary material
Source: PubMed Central journal article supplement (PMC5792071)
Supplement: NIHMS935830-supplement-Table_S4.pdf [file NIHMS935830-supplement-Table_S4.pdf]

TABLE S4. BEAST settings of 16 individual molecular dating analyses. Analysis names corresponding to Fig. 3, letters provided in column “Constraints used” refer to Table S1 and Fig. 1. Individual prior distribution means are provided in detail in Table S1.

| Analysis    | Site Model    | Clock        | Constraints used                                                                      | prior distribution | Mean       | Speciation :                             | Root                          | taxa          | number of runs | burnin (each) | generations (each)  | sample frequency |
|-------------|---------------|--------------|---------------------------------------------------------------------------------------|--------------------|------------|------------------------------------------|-------------------------------|---------------|----------------|---------------|---------------------|------------------|
| Ref         | GT<br>R+<br>G | U<br>CL<br>N | A, B,<br>C, D,<br>E, G,<br>H, I, J,<br>K, L,<br>M, N,<br>O, P,<br>Q, R,<br>S, T,<br>U | Lognormal          | individual | Birth<br>Death<br>incomplete<br>sampling | uniform<br>323-<br>400<br>mya | full sampling | 2              | 5,000<br>,000 | 250,0<br>00,00<br>0 | 5,00<br>0        |
| root<br>500 | GT<br>R+<br>G | U<br>CL<br>N | A, B,<br>C, D,<br>E, G,<br>H, I, J,<br>K, L,<br>M, N,<br>O, P,<br>Q, R,<br>S, T,<br>U | Lognormal          | individual | Birth<br>Death<br>incomplete<br>sampling | uniform<br>323-<br>500<br>mya | full sampling | 1              | 5,000<br>,000 | 250,0<br>00,00<br>0 | 5,00<br>0        |
| noR<br>oot  | GT<br>R+<br>G | U<br>CL<br>N | A, B,<br>C, D,<br>E, G,<br>H, I, J,<br>K, L,<br>M, N,<br>O, P,<br>Q, R,<br>S, T,<br>U | Lognormal          | individual | Birth<br>Death<br>incomplete<br>sampling | no<br>constraint              | full sampling | 1              | 5,000<br>,000 | 250,0<br>00,00<br>0 | 5,00<br>0        |
| mean<br>2   | GT<br>R+<br>G | U<br>CL<br>N | A, B,<br>C, D,<br>E, G,<br>H, I, J,<br>K, L,<br>M, N,                                 | Lognormal          | all 2      | Birth<br>Death<br>incomplete             | uniform<br>323-<br>400<br>mya | full sampling | 1              | 5,000<br>,000 | 250,0<br>00,00<br>0 | 5,00<br>0        |

|                   |               |              |                                                                                          |                     |                |                                                         |                                   |               |   |                |                     |           |
|-------------------|---------------|--------------|------------------------------------------------------------------------------------------|---------------------|----------------|---------------------------------------------------------|-----------------------------------|---------------|---|----------------|---------------------|-----------|
|                   |               |              | O, P,<br>Q, R,<br>S, T,<br>U                                                             |                     |                | samp<br>ling                                            |                                   |               |   |                |                     |           |
| exp               | GT<br>R+<br>G | U<br>CL<br>N | A, B,<br>C, D,<br>E, G,<br>H, I, J,<br>K, L,<br>M, N,<br>O, P,<br>Q, R,<br>S, T,<br>U    | Expo<br>nenti<br>al | all 2          | Birth<br>Deat<br>h<br>inco<br>mlet<br>e<br>samp<br>ling | unifo<br>rm<br>323-<br>400<br>mya | full sampling | 1 | 5,000<br>,000  | 250,0<br>00,00<br>0 | 5,00<br>0 |
| Chlo<br>rA        | GT<br>R+<br>G | U<br>CL<br>N | A, B,<br>C, D,<br>E, F,<br>G, H,<br>I, J, K,<br>L, M,<br>N, O,<br>P, Q,<br>R, S,<br>T, U | Logno<br>rmal       | indiv<br>idual | Birth<br>Deat<br>h<br>inco<br>mlet<br>e<br>samp<br>ling | unifo<br>rm<br>323-<br>400<br>mya | full sampling | 1 | 5,000<br>,000  | 250,0<br>00,00<br>0 | 5,00<br>0 |
| Chlo<br>rB        | GT<br>R+<br>G | U<br>CL<br>N | A, B,<br>C, D,<br>E, f,<br>G, H,<br>I, J, K,<br>L, M,<br>N, O,<br>P, Q,<br>R, S,<br>T, U | Logno<br>rmal       | indiv<br>idual | Birth<br>Deat<br>h<br>inco<br>mlet<br>e<br>samp<br>ling | unifo<br>rm<br>323-<br>400<br>mya | full sampling | 1 | 10,00<br>0,000 | 250,0<br>00,00<br>0 | 5,00<br>0 |
| notr<br>icol<br>p | GT<br>R+<br>G | U<br>CL<br>N | A, B,<br>C, D,<br>E, F,<br>G, H,<br>I, J, K,<br>L, M,<br>N, O,<br>P, Q,<br>S, T,<br>U    | Logno<br>rmal       | indiv<br>idual | Birth<br>Deat<br>h<br>inco<br>mlet<br>e<br>samp<br>ling | unifo<br>rm<br>323-<br>400<br>mya | full sampling | 1 | 5,000<br>,000  | 250,0<br>00,00<br>0 | 5,00<br>0 |
| no<br>Wal<br>k    | GT<br>R+<br>G | U<br>CL<br>N | A, B,<br>C, D,<br>E, F,                                                                  | Logno<br>rmal       | indiv<br>idual | Birth<br>Deat<br>h                                      | unifo<br>rm<br>323-               | full sampling | 1 | 25,00<br>0,000 | 250,0<br>00,00<br>0 | 5,00<br>0 |

|        |         |        |                                                                                       |           |            |                                 |                     |                                                                                                                                                                                       |   |           |         |       |
|--------|---------|--------|---------------------------------------------------------------------------------------|-----------|------------|---------------------------------|---------------------|---------------------------------------------------------------------------------------------------------------------------------------------------------------------------------------|---|-----------|---------|-------|
|        |         |        | H, I, J,<br>K, L,<br>M, N,<br>O, P,<br>Q, R,<br>S, T,<br>U                            |           |            | incomplete sampling             | 400 mya             |                                                                                                                                                                                       |   |           |         |       |
| noL ac | GT R+ G | U CL N | A, B,<br>C, D,<br>E, G,<br>I, J, K,<br>L, M,<br>N, O,<br>P, Q,<br>R, S,<br>T, U       | Lognormal | individual | Birth Death incomplete sampling | uniform 323-400 mya | full sampling                                                                                                                                                                         | 1 | 5,000,000 | 250,000 | 5,000 |
| Pip13  | GT R+ G | U CL N | A, B,<br>C, D,<br>E, G,<br>H, I, J,<br>K, L,<br>M, N,<br>O, P,<br>Q, R,<br>S, T,<br>U | Lognormal | individual | Birth Death incomplete sampling | uniform 323-400 mya | 13 Piperales (Asarum, Saruma, Lactoris, Aristolochia serpentaria, Thottea, Houttuynia, Gymnotheca, Saururus, Verhuellia, Zippelia, Manekia, Piper hostmannianum, Peperomia hispidula) | 1 | 5,000,000 | 250,000 | 5,000 |
| Pip9   | GT R+ G | U CL N | A, B,<br>C, D,<br>E, G,<br>H, I, J,<br>K, L,<br>M, N,<br>O, P,<br>Q, R,<br>S, T,<br>U | Lognormal | individual | Birth Death incomplete sampling | uniform 323-400 mya | 9 Piperales no Piperaceae (Asarum, Saruma, Lactoris, Aristolochia serpentaria, Thottea, Houttuynia, Gymnotheca, Saururus, Verhuellia)                                                 | 1 | 5,000,000 | 250,000 | 5,000 |
| 5A     | GT      | U      | C, D,                                                                                 | Lognormal | individual | Birth                           | uniform             | full sampling                                                                                                                                                                         | 1 | 3,000     | 250,0   | 5,00  |

|     |               |              |                                          |               |                |                                                         |                                   |               |   |               |                     |           |
|-----|---------------|--------------|------------------------------------------|---------------|----------------|---------------------------------------------------------|-----------------------------------|---------------|---|---------------|---------------------|-----------|
|     | R+<br>G       | CL<br>N      | E, O,<br>S                               | rmal          | idual          | Deat<br>h<br>inco<br>mlet<br>e<br>samp<br>ling          | rm<br>323-<br>400<br>mya          |               |   | ,000          | 00,00<br>0          | 0         |
| 5B  | GT<br>R+<br>G | U<br>CL<br>N | I, K,<br>P, Q,<br>S,                     | Logno<br>rmal | indiv<br>idual | Birth<br>Deat<br>h<br>inco<br>mlet<br>e<br>samp<br>ling | unifo<br>rm<br>323-<br>400<br>mya | full sampling | 1 | 5,000<br>,000 | 250,0<br>00,00<br>0 | 5,00<br>0 |
| 10A | GT<br>R+<br>G | U<br>CL<br>N | A, B,<br>C, D,<br>H, M,<br>N, Q,<br>S, T | Logno<br>rmal | indiv<br>idual | Birth<br>Deat<br>h<br>inco<br>mlet<br>e<br>samp<br>ling | unifo<br>rm<br>323-<br>400<br>mya | full sampling | 1 | 5,000<br>,000 | 250,0<br>00,00<br>0 | 5,00<br>0 |
| 10B | GT<br>R+<br>G | U<br>CL<br>N | A, D,<br>E, I,<br>K, L,<br>M, P,<br>T, U | Logno<br>rmal | indiv<br>idual | Birth<br>Deat<br>h<br>inco<br>mlet<br>e<br>samp<br>ling | unifo<br>rm<br>323-<br>400<br>mya | full sampling | 1 | 5,000<br>,000 | 250,0<br>00,00<br>0 | 5,00<br>0 |
